# Supplementary material for: Performance-weighted ensemble learning for detecting patients with FTD and ALS from brief reading speech
Source: Research Square preprint supplement (doi:10.21203/rs.3.rs-7221442/v1), 2025-08-19
Supplement: Supplementary file 1 [file b0c51242c7f529116bcbb826.docx]

| **Table S1.** Proportion (n, %) of correct classification by recorded location | | | | |
| --- | --- | --- | --- | --- |
|  |  |  |  |  |
| Location | Correct, n | Error, n | total,n | Accuracy, % |
| Nagoya | 114 | 26 | 140 | 0.814 |
| Osaka | 19 | 9 | 28 | 0.679 |
| Toyoake | 19 | 10 | 29 | 0.655 |
| total | 152 | 45 | 197 | 0.772 |

| **Table S2.** Discrimination performance of each reading task (FTD and ALS vs. HC). | | | | | | | | | | | | | | | | | | |
| --- | --- | --- | --- | --- | --- | --- | --- | --- | --- | --- | --- | --- | --- | --- | --- | --- | --- | --- |
|  |  |  | | | |  | |  | |  |  | |  |  | |  | |  |
|  | No. | Speech Task (romaji, figure) | | | | total | | Sen for each disease | | | | | | Spec | | Acc | | macro-F1 |
| Sen | | ALS | | PNFA | bvFTD | | SD |
| word | 1 | mado | | | | 0.674 | | 0.690 | | 0.600 | 0.400 | | 0.733 | 0.689 | | 0.680 | | 0.678 |
| 2 | paipu | | | | 0.712 | | 0.677 | | 0.700 | **0.900** | | 0.800 | 0.720 | | 0.716 | | 0.715 |
| 3 | denwa | | | | 0.702 | | 0.744 | | 0.400 | 0.600 | | 0.667 | 0.710 | | 0.706 | | 0.703 |
| 4 | nasu | | | | 0.567 | | 0.540 | | 0.800 | 0.400 | | 0.667 | 0.709 | | 0.634 | | 0.630 |
| 5 | banana | | | | 0.702 | | 0.662 | | **1.000** | 0.600 | | 0.867 | 0.632 | | 0.670 | | 0.665 |
| 6 | sanjuu-san (33) | | | | 0.711 | | 0.701 | | 0.900 | 0.600 | | 0.733 | 0.678 | | 0.696 | | 0.694 |
| 7 | yukidaruma | | | | 0.615 | | 0.540 | | **1.000** | 0.500 | | 0.800 | 0.677 | | 0.645 | | 0.644 |
| 8 | nijuu-go paasento (25 percent) | | | | 0.703 | | 0.623 | | **1.000** | **0.900** | | 0.867 | **0.795** | | 0.746 | | 0.746 |
| 9 | kyuujuu-ni bunno ichi (1/92) | | | | 0.682 | | 0.661 | | **1.000** | 0.500 | | 0.733 | 0.656 | | 0.671 | | 0.669 |
| sentence | 10 | denwa ga natte imasu. | | | | 0.635 | | 0.542 | | 0.900 | 0.800 | | 0.867 | 0.719 | | 0.675 | | 0.673 |
| 11 | sakana ya wa genki deshita. | | | | 0.635 | | 0.595 | | 0.700 | 0.400 | | 0.867 | 0.730 | | 0.681 | | 0.678 |
| 12 | ani wa mada modori masen. | | | | 0.644 | | 0.594 | | **1.000** | 0.500 | | 0.800 | 0.697 | | 0.670 | | 0.668 |
| 13 | nihon koukou yakyuu renmei. | | | | 0.682 | | 0.647 | | 0.700 | 0.300 | | **1.000** | 0.698 | | 0.691 | | 0.689 |
| 14 | dakedo, yappari, demo wa dame. | | | | 0.596 | | 0.581 | | **1.000** | 0.200 | | 0.667 | 0.733 | | 0.661 | | 0.660 |
| 15 | atarashii amazake wo go hon no hyoutan ni irenasai. | | | | **0.777** | | **0.752** | | 0.900 | 0.500 | | 0.933 | 0.752 | | **0.766** | | **0.763** |
| non-word | 16 | tokeienpitsu | | | | 0.537 | | 0.525 | | 0.700 | 0.300 | | 0.600 | 0.633 | | 0.584 | | 0.580 |
| Results of the best performing task are highlighted in bold. | | | | | |  | |  | |  |  | |  |  | |  | |  |
| **Table S3.** Comparison of clinical features between the two groups based on correct and error classifications. | | | | | | | | | | | | | | |  | |
|  | | |  | |  | |  | |  | | |  | | |  | |
|  | | | FTD and ALS | | | | p - value | | HC | | | | | | p - value | |
| variables | | | Correct, n=87 | | Error, n=17 | | Correct, n=65 | | | Error, n=28 | | |
| age | | | 67.7 (8.7) | | 60.2 (14.4) | | 0.041 | | 67.6 (7.9) | | | 68.5 (10.7) | | | 0.348 | |
| gender, M / F | | | 45 / 42 | | 9 / 8 | | 0.927 | | 20 / 45 | | | 15 / 13 | | | 0.037 | |
| education | | | 12.3 (2.5) | | 11.6 (1.8) | | 0.312 | | 13.4 (2.1) | | | 13.4 (2.0) | | | 0.899 | |
| MMSE1 | | | 24.0 (5.5) | | 25.6 (5.1) | | 0.124 | | 28.9 (1.1) | | | 28.8 (1.0) | | | 0.403 | |
| ACE-R1 | | | 75.2 (22.8) | | 80.8 (21.5) | | 0.257 | | 95.8 (3.2) | | | 95.3 (3.3) | | | 0.465 | |
| WAB, AQ1 | | | 85.7 (15.0) | | 90.0 (11.6) | | 0.182 | | 97.0 (2.5) | | | 97.5 (2.0) | | | 0.352 | |
| Spontaneous Speech (/20) | | | 16.9 (2.6) | | 17.5 (2.6) | | 0.223 | | 19.2 (0.9) | | | 19.5 (0.7) | | | 0.054 | |
| Auditory comprehension (/10)1 | | | 8.8 (1.6) | | 9.3 (1.3) | | 0.117 | | 9.8 (0.3) | | | 9.7 (0.3) | | | 0.252 | |
| Repetition (/10) | | | 9.2 (1.5) | | 9.7 (0.7) | | 0.161 | | 9.9 (0.2) | | | 9.9 (0.1) | | | 0.119 | |
| Naming (/10)1 | | | 8.1 (2.6) | | 8.6 (2.1) | | 0.350 | | 9.6 (0.4) | | | 9.6 (0.3) | | | 0.546 | |
| disease duration1 | | | 2.2 (2.3) | | 1.4 (0.9) | | 0.254 | |  | | |  | | |  | |
| ALSFRS, total1 | | | 39.6 (3.9) | | 41.5 (3.2) | | 0.052 | |  | | |  | | |  | |
| bulb 1-3 (/12) | | | 10.8 (1.6) | | 11.8 (0.4) | | 0.035 | |  | | |  | | |  | |
| motor 4-9 (/24) | | | 17.4 (3.5) | | 17.9 (3.1) | | 0.391 | |  | | |  | | |  | |
| resp 10-12 (/12) | | | 11.4 (1.1) | | 11.8 (0.4) | | 0.149 | |  | | |  | | |  | |
| Data are mean (SD). the Mann-Whitney U test and the chi-square tests for variables between the two independent study groups. | | | | | | | | | | | | | | | | |
| **Table S4.** The17 linguistic Features. | | | |  | | | | | | | | | | | | | | | |
|  | | | |  | | | | | | | | | | | | | | | |
| **Features** | | | | **Description** | | | | | | | | | | | | | | | |
| Proportion of Parts of Speech (12 types) | | | | The proportion of each part of speech in the utterance. (verbs, adjectives, adjectival verbs, nouns, adverbs, pre-nouns, conjunctions, interjections, auxiliary verbs, particles, symbols, fillers) | | | | | | | | | | | | | | | |
| Total Number of Words (*N*) | | | | The number of words contained in the utterance. | | | | | | | | | | | | | | | |
| Number of Unique Words (*V (N)*) | | | | The number of unique words, excluding duplicates, from the total 137 number of words. | | | | | | | | | | | | | | | |
| Confidence Score | | | | The accuracy of predictions obtained from the speech recognition system output. | | | | | | | | | | | | | | | |
| Type-Token Ratio (TTR) | | | | The value obtained by dividing the number of unique words by the total number of words. | | | | | | | | | | | | | | | |
| Simpson’s D value | | | | An index that quantitatively evaluates the richness of vocabulary in a text. | | | | | | | | | | | | | | | |

| **Table S5.** The 4 temporal features.. |  |
| --- | --- |
|  |  |
| **Features** | **Description** |
| reaction time | Time between monitor display and start of response. |
| speech time | Time taken to answer |
| speech speed (*N* / sec) | Number of words spoken per seconds |
| speech speed (*V(N)* / sec) | Number of Unique Words per seconds |

| **Table S6.** Hyperparameter optimization settings for weak learner models. | |  |  |
| --- | --- | --- | --- |
|  |  |  |  |
| model | parameter | value_search_range | search_method |
| SVM | Kernel | rbf | GridSearchCV |
| SVM | *C* | 0.001, 0.01, 0.1, 1, 10, 100 | GridSearchCV |
| SVM | γ | 0.001, 0.01, 0.1, 1, 10, 100 | GridSearchCV |
| RandomForest | n_estimators | 1, 2, …, 20 | GridSearchCV |
| RandomForest | criterion | 'gini', 'entropy' | GridSearchCV |
| RandomForest | max_depth | 1, 2, 3, 4 | GridSearchCV |
| LightGBM | boosting_type | gbdt | Fixed |
| LightGBM | objective | binary | Fixed |
| LightGBM | learning_rate | 0.1 | Fixed |
| LightGBM | metric | binary_logloss | Fixed |
| LightGBM | max_depth | 7 | Fixed |
| LightGBM | n_estimators | 1000 | Fixed |
| LightGBM | early_stopping_rounds | 10 | Fixed |
| LightGBM | importance_type | gain | Fixed |
| LightGBM | reg_alpha | 0.0001 ~ 0.01 | Optuna |
| LightGBM | reg_lambda | 0.0001 ~ 0.1 | Optuna |
| LightGBM | num_leaves | 2,3, ..., 8 | Optuna |
| LightGBM | min_data_in_leaf | 10 ~ 20 | Optuna |
| LightGBM | colsample_bytree | 0 ~ 1 | Optuna |
| LightGBM | subsample | 0.7 ~ 0.9 | Optuna |
| LightGBM | subsample_freq | 4 ~ 8 | Optuna |
| LightGBM | min_child_samples | 1 ~ 7 | Optuna |
| LightGBM | feature_fraction | 0.6 ~ 0.8 | Optuna |
|  |  |  |  |
| SVM, Support Vector Machine |  |  |  |
